# Supplementary material for: The influence of land use and management on the behaviour and persistence of soil organic carbon in a subtropical Ferralsol
Source: Copernicus journal article supplement (doi:10.5194/egusphere-2023-2983), 2023-12-22
Supplement: Supplementary file 1 [file egusphere-2023-2983-supplement.pdf]

# **The influence of land use and management on the behaviour and persistence of soil organic carbon in a subtropical Ferralsol**

Laura Hondroudakis<sup>1</sup>, Peter M. Kopittke<sup>1,\*</sup>, Ram C. Dalal<sup>1</sup>, Meghan Barnard<sup>1</sup>, Zhe H. Weng<sup>1</sup>

<sup>1</sup>The University of Queensland, School of Agriculture and Food Sciences, St Lucia, Queensland 4072, Australia

*Correspondence to:* Peter M. Kopittke (p.kopittke@uq.edu.au)

**Supplementary Table S1:** Background and land use history for the soils collected from Kingaroy adapted from Zhang et al. (2020).

| Land Use           | Time since last land use change (y) | Vegetation                                                                   | Fertiliser                                                                                                                                                                                                                                                                                                                                            |
|--------------------|-------------------------------------|------------------------------------------------------------------------------|-------------------------------------------------------------------------------------------------------------------------------------------------------------------------------------------------------------------------------------------------------------------------------------------------------------------------------------------------------|
| Remnant Vegetation | N/A                                 | Native Vine Scrub                                                            | N/A                                                                                                                                                                                                                                                                                                                                                   |
| Plantation         | 21                                  | Spotted gum ( <i>Corymbia citriodora</i> spp. <i>Variiegata</i> )            | Nil                                                                                                                                                                                                                                                                                                                                                   |
| Cropped            | 72                                  | Peanut ( <i>Arachis hypogaea</i> ) – maize ( <i>Zea mays</i> )               | 1950–2010: Nil<br>2010–2017: 50 kg ha <sup>-1</sup> P ha <sup>-1</sup> as MOP and 12 kg as diammonium phosphate (DAP) plus Petrik micronutrients at planting for peanuts. 70 kg ha <sup>-1</sup> urea, 40 kg ha <sup>-1</sup> P ha <sup>-1</sup> as MOP and 9.4 kg as DAP, 4 kg ha <sup>-1</sup> Zn plus Petrik micronutrients at planting for maize. |
| Pasture            | 39                                  | Wiregrass ( <i>Aristida ramosa</i> )/ Rhodes grass ( <i>Chloris gayana</i> ) | Nil                                                                                                                                                                                                                                                                                                                                                   |

**Supplementary Table S2:** The average concentration of C, N and C/N ratios of each soil fraction from four land uses, separated by density fractionation and elemental concentration determined by IRMS. fPOM is free particulate organic matter, oPOM is aggregate-occluded particulate organic matter, coarse fraction-MAOM is coarse grained (>53  $\mu\text{m}$ ) mineral-associated organic matter, and fine fraction-MAOM is fine grained (>53  $\mu\text{m}$ ) mineral-associated organic matter. Standard error is reported in parentheses ( $n = 5$ ).

|                                      |                          | Land Use              |             |              |              |
|--------------------------------------|--------------------------|-----------------------|-------------|--------------|--------------|
|                                      |                          | Remnant<br>Vegetation | Pasture     | Plantation   | Cropped      |
| <b>fPOM</b>                          | C ( $\text{mg g}^{-1}$ ) | 254 (8.30)            | 224 (12.4)  | 225 (13.4)   | 242 (13.6)   |
|                                      | N ( $\text{mg g}^{-1}$ ) | 18.1 (0.66)           | 12.1 (0.71) | 11.0 (0.34)  | 12.1 (1.10)  |
|                                      | C/N ratio                | 14.1 (0.15)           | 18.6 (0.67) | 20.4 (0.64)  | 20.5 (1.73)  |
| <b>oPOM</b>                          | C ( $\text{mg g}^{-1}$ ) | 361 (13.9)            | 360 (3.39)  | 358 (4.77)   | 383 (7.60)   |
|                                      | N ( $\text{mg g}^{-1}$ ) | 24.2 (0.61)           | 23.1 (0.24) | 17.9 (0.18)  | 19.1 (1.07)  |
|                                      | C/N ratio                | 14.9 (0.25)           | 15.6 (0.27) | 20.0 (0.348) | 20.3 (1.33)  |
| <b>Coarse<br/>fraction-<br/>MAOM</b> | C ( $\text{mg g}^{-1}$ ) | 15.6 (1.17)           | 8.38 (1.26) | 8.43 (1.16)  | 2.95 (0.21)  |
|                                      | N ( $\text{mg g}^{-1}$ ) | 1.25 (0.09)           | 0.65 (0.09) | 0.600 (0.09) | 0.225 (0.03) |
|                                      | C/N ratio                | 12.5 (0.19)           | 12.8 (0.29) | 14.2 (0.39)  | 13.3 (0.97)  |
| <b>Fine fraction-<br/>MAOM</b>       | C ( $\text{mg g}^{-1}$ ) | 57.5 (0.76)           | 39.5 (1.58) | 47.6 (1.29)  | 18.3 (0.38)  |
|                                      | N ( $\text{mg g}^{-1}$ ) | 6.26 (0.11)           | 4.23 (0.14) | 4.75 (0.21)  | 1.95 (0.03)  |
|                                      | C/N ratio                | 9.23 (0.06)           | 9.34 (0.09) | 10.0 (0.18)  | 9.36 (0.09)  |

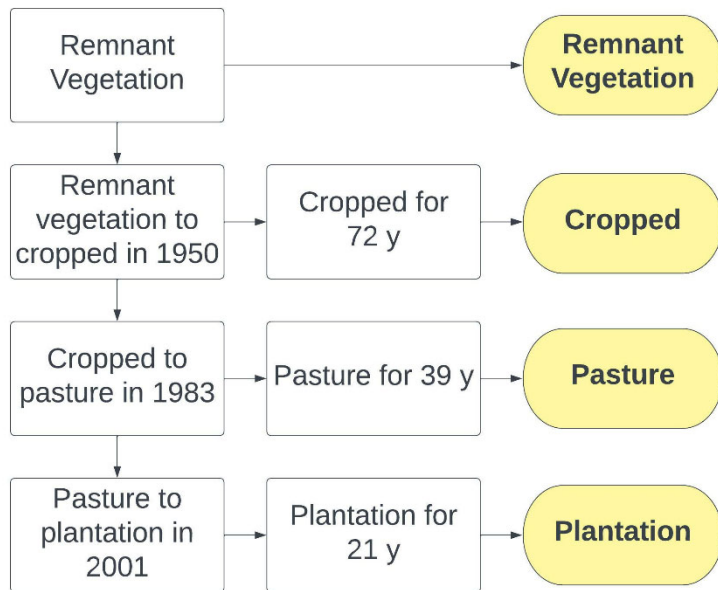

**Supplementary Figure S1:** A Summary of the land use change history of the four land uses sampled from the Kingaroy study site [updated from Zhang et al. (2020)].

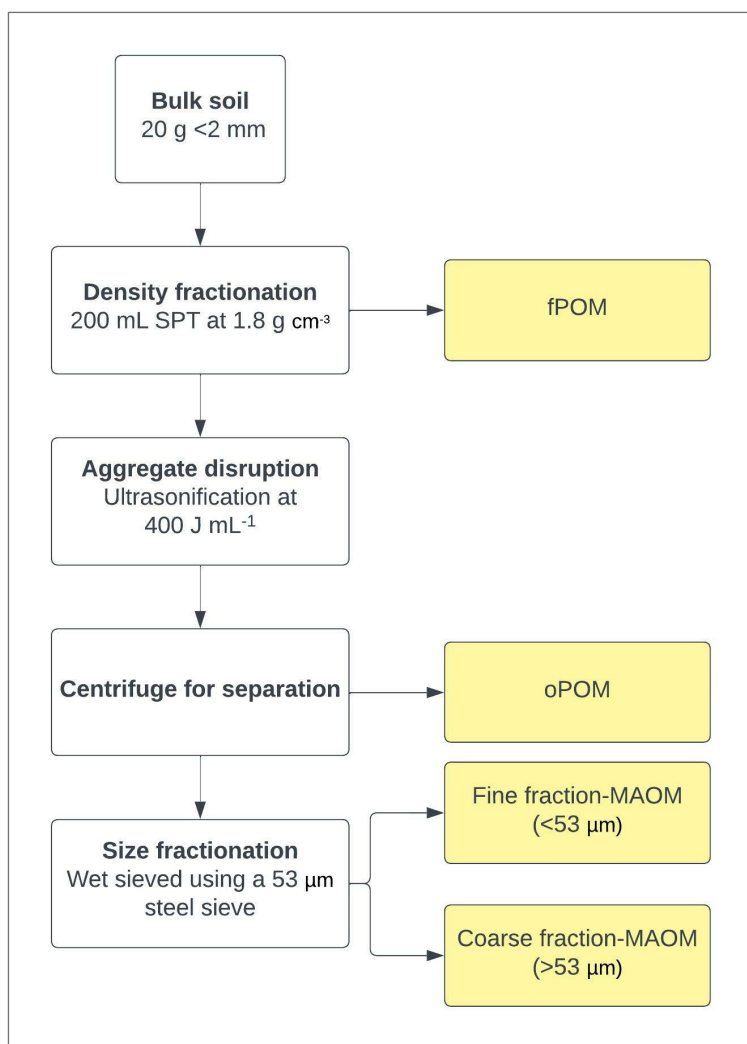

**Supplementary Figure S2:** Density fractionation and size fractionation process used to separate the bulk soil into four fractions: free particulate organic matter (fPOM), aggregate-occluded organic matter (oPOM), coarse mineral-associated organic matter (coarse fraction-MAOM) and fine mineral-associated organic matter (fine fraction-MAOM).

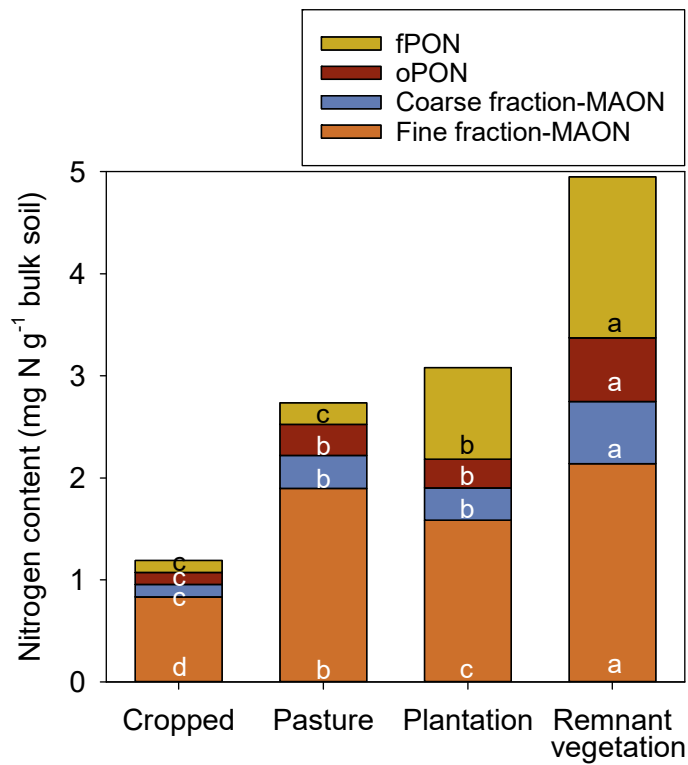

**Supplementary Figure S3:** The nitrogen content for each soil fraction within the bulk soil from topsoils (0-10cm) collected from four land uses. fPON is free particulate organic nitrogen, oPON is aggregate-occluded particulate organic nitrogen, coarse fraction-MAON is coarse grained (> 53 $\mu$ m) mineral-associated organic nitrogen and coarse fraction-MAON is fine grained (> 53 $\mu$ m) mineral-associated organic nitrogen. Lower-case letters indicate least significant differences (95 % confidence level for each comparison) between the same fractions across land uses.

## **Supplementary References**

Zhang, Y., Bhattacharyya, R., Dalal, R.C., Wang, P., Menzies, N.W., Kopittke, P.M., 2020.

Impact of land use change and soil type on total phosphorus and its fractions in soil aggregates. *Land Degrad. Dev.* 31, 828-841.
